# Supplementary material
Source: publisher figshare collection journal article supplement (https://acs.figshare.com/ndownloader/files/13270190)
Supplement: Supplementary file 1 [file 13270190]

# On the Henry Constant of Water Adsorption on Functionalized Graphite

## The Importance of the Potential Models of Water and Functional Group

Yonghong Zeng<sup>1</sup>, Hui Xu<sup>1</sup>, Toshihide Horikawa<sup>2</sup>, D. D. Do<sup>\*1</sup> and D. Nicholson<sup>1</sup>

<sup>1</sup>School of Chemical Engineering, University of Queensland, St. Lucia, QLD 4072, Australia

<sup>2</sup>Department of Advanced Materials, University of Tokushima, 2-1 Minamijosanjima, Tokushima 770-8506, Japan

### Supporting Information

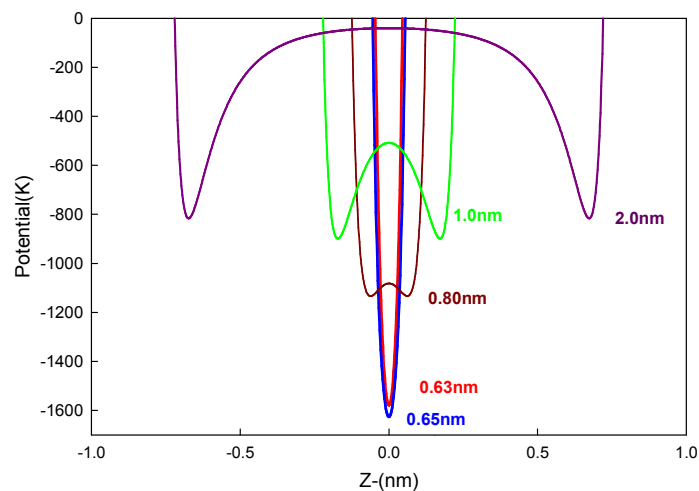

**Figure S1.** Potential profile of water (SPCE) molecule in slit pores with different pore sizes.

*Figure S1* shows the solid fluid potential profile of water in slit pores of different widths.
